# Supplementary material for: Heteroleptic iridium(iii) complexes bearing a coumarin moiety: an experimental and theoretical investigation
Source: Royal Society of Chemistry journal article supplement (doi:10.1039/c5ra08349d), 2015-01-01
Supplement: c5ra08349d1.pdf [file c5ra08349d1.pdf]

RSC Advances

Manuscript ID: RA-ART-05-2015-008349.R3

*Electronic Supplementary Information*

**Heteroleptic Iridium (III) complexes bearing  
coumarine moiety: an experimental and  
theoretical investigation†**

*Amit Maity, Rupa Sarkar and Kajal Krishna Rajak\**

Inorganic Chemistry Section, Department of Chemistry, Jadavpur University, Kolkata, 700  
032, India

\* To whom correspondence should be addressed. Email: [kajalrajak@hotmail.com](mailto:kajalrajak@hotmail.com)

Jadavpur University

**Table S1** Selected optimized geometrical parameters for **2** and **3** in the ground ( $S_0$ ) and lowest lying triplet ( $T_1$ ) excited states at B3LYP Levels using basis set aug-cc-pVDZ-pp for Ir atoms.

|            | Bond Lengths (Å) |       |          |       |
|------------|------------------|-------|----------|-------|
|            | <b>2</b>         |       | <b>3</b> |       |
|            | $S_0$            | $T_1$ | $S_0$    | $T_1$ |
| Ir1–O1     | 2.086            | 2.081 | 2.076    | 2.087 |
| Ir1–N3     | 2.188            | 2.136 | 2.189    | 2.196 |
| Ir1–N2     | 2.047            | 2.054 | 2.047    | 2.046 |
| Ir1–N1     | 2.185            | 2.201 | 2.184    | 2.182 |
| Ir1–C12    | 2.023            | 2.015 | 2.022    | 2.021 |
| Ir1–C1     | 2.038            | 2.058 | 2.035    | 2.055 |
|            | Bond Angles (°)  |       |          |       |
|            | <b>2</b>         |       | <b>3</b> |       |
|            | $S_0$            | $T_1$ | $S_0$    | $T_1$ |
| O1–Ir1–N3  | 88.0             | 84.3  | 87.9     | 87.9  |
| N3–Ir1–N1  | 95.9             | 95.8  | 95.5     | 95.5  |
| N1–Ir1–C1  | 79.1             | 78.8  | 79.2     | 79.2  |
| N2–Ir1–C12 | 80.2             | 80.4  | 80.3     | 80.2  |
| O1–Ir1–N1  | 84.4             | 90.1  | 84.8     | 84.4  |
| N1–Ir1–N2  | 175.6            | 171.3 | 176.0    | 176.0 |
| C1–Ir1–C12 | 88.3             | 87.7  | 88.2     | 88.3  |
| C1–Ir1–O1  | 87.6             | 85.3  | 87.6     | 87.3  |
| C12–Ir1–N1 | 99.2             | 95.5  | 99.2     | 99.1  |
| C1–Ir1–N2  | 96.5             | 93.2  | 96.8     | 96.8  |
| C12–Ir1–O1 | 173.8            | 170.0 | 173.5    | 173.4 |
| N2–Ir1–O1  | 95.6             | 92.7  | 95.2     | 95.3  |
| C1–Ir1–N3  | 173.7            | 168.3 | 173.4    | 173.3 |
| N2–Ir1–N3  | 88.4             | 92.5  | 88.4     | 88.3  |
| C12–Ir1–N3 | 96.3             | 103.1 | 96.5     | 96.6  |

**Table S2** Frontier Molecular Orbital Composition (%) in the Ground State for [Ir(2-pypy)<sub>2</sub>(L<sup>2</sup>)], **2**

| Orbital | Energy (eV) | Contribution (%) |        |                 |                 | Main bond type                                     |
|---------|-------------|------------------|--------|-----------------|-----------------|----------------------------------------------------|
|         |             | Ir               | 2-pypy | HL <sup>2</sup> |                 |                                                    |
|         |             |                  |        | Imine           | Aromatic system |                                                    |
| LUMO+5  | -1.190      | 0                | 16     | 2               | 83              | $\pi^*$ (2-pypy) + $\pi^*$ (HL <sup>2</sup> )      |
| LUMO+4  | -1.340      | 1                | 3      | 0               | 97              | $\pi^*$ (2-pypy) + $\pi^*$ ( HL <sup>2</sup> )     |
| LUMO+3  | -1.720      | 5                | 0      | 0               | 96              | $\pi^*$ ( HL <sup>2</sup> )                        |
| LUMO+2  | -1.770      | 3                | 1      | 0               | 96              | $\pi^*$ ( HL <sup>2</sup> )                        |
| LUMO+1  | -1.900      | 1                | 75     | 22              | 2               | $\pi^*$ (2-pypy) + $\pi^*$ ( HL <sup>2</sup> )     |
| LUMO    | -2.100      | 2                | 73     | 25              | 0               | $\pi^*$ (2-pypy) + $\pi^*$ ( HL <sup>2</sup> )     |
| HOMO    | -5.490      | 40               | 30     | 4               | 27              | d(Ir) + $\pi$ (2-pypy) + $\pi$ ( HL <sup>2</sup> ) |
| HOMO-1  | -5.650      | 43               | 31     | 0               | 26              | d(Ir) + $\pi$ (2-pypy) + $\pi$ ( HL <sup>2</sup> ) |
| HOMO-2  | -5.810      | 38               | 13     | 1               | 48              | d(Ir) + $\pi$ (2-pypy) + $\pi$ ( HL <sup>2</sup> ) |
| HOMO-3  | -6.140      | 6                | 82     | 5               | 7               | $\pi$ (2-pypy)                                     |
| HOMO-4  | -6.480      | 13               | 10     | 0               | 77              | d(Ir) + $\pi$ ( HL <sup>2</sup> )                  |
| HOMO-5  | -6.570      | 16               | 25     | 0               | 59              | d(Ir) + $\pi$ (2-pypy) + $\pi$ (HL <sup>2</sup> )  |

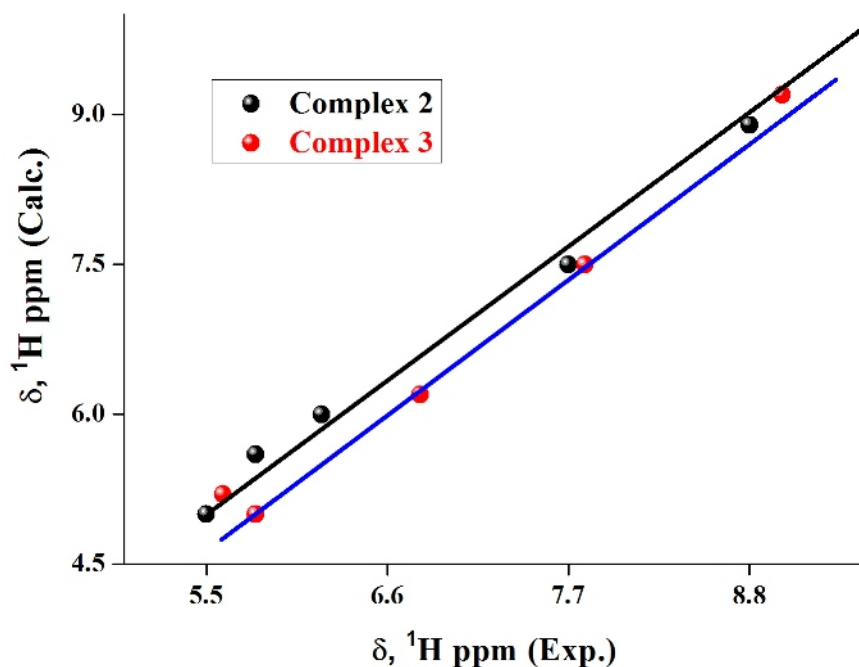

**Fig. S1 (a)** Linear correlation between the experimental and calculated <sup>1</sup>H NMR chemical shifts of **complex 2** and **complex 3**.

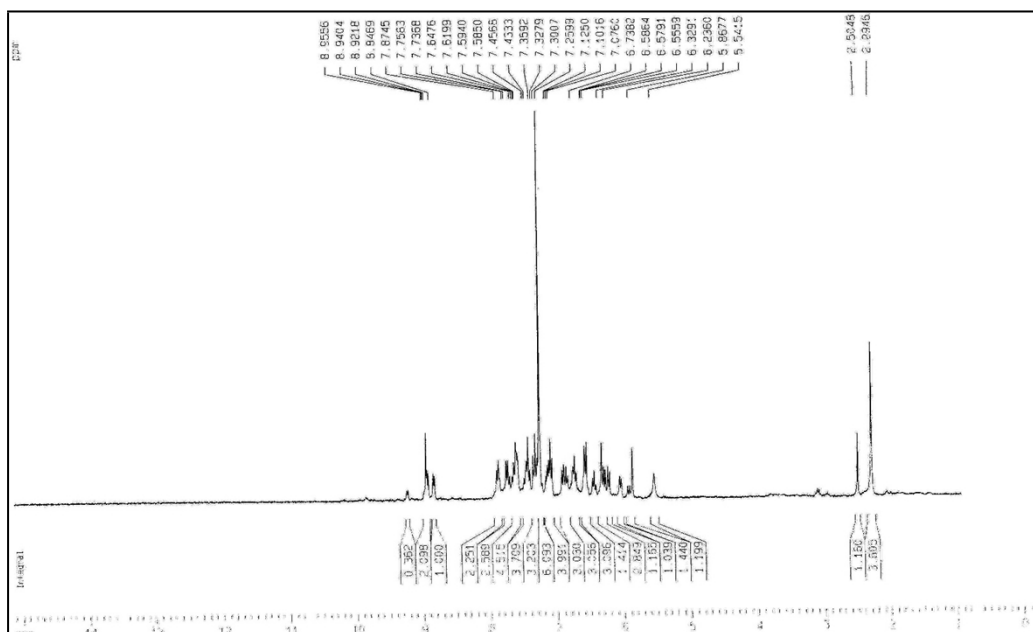

Fig. S1 (b)  $^1\text{H}$  NMR spectrum of complex **2** in  $\text{CDCl}_3$  solution.

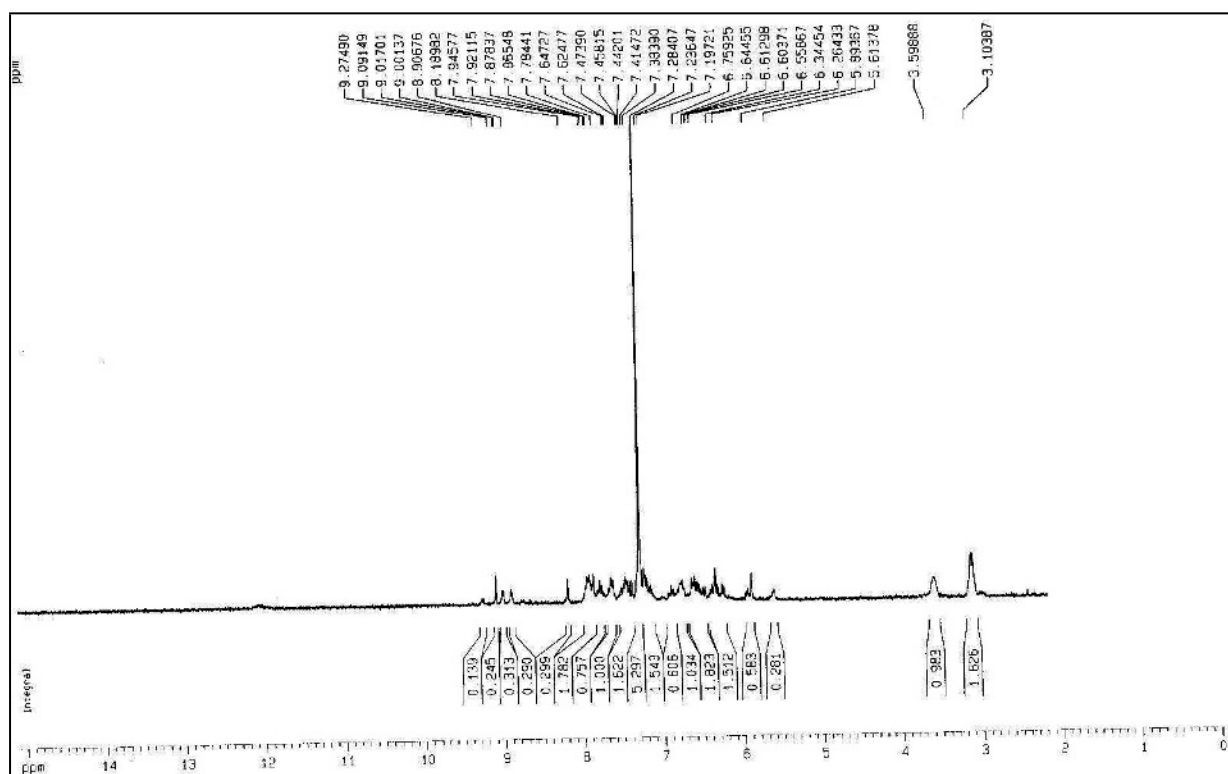

Fig. S1 (c)  $^1\text{H}$  NMR spectrum of complex **3** in  $\text{CDCl}_3$  solution.

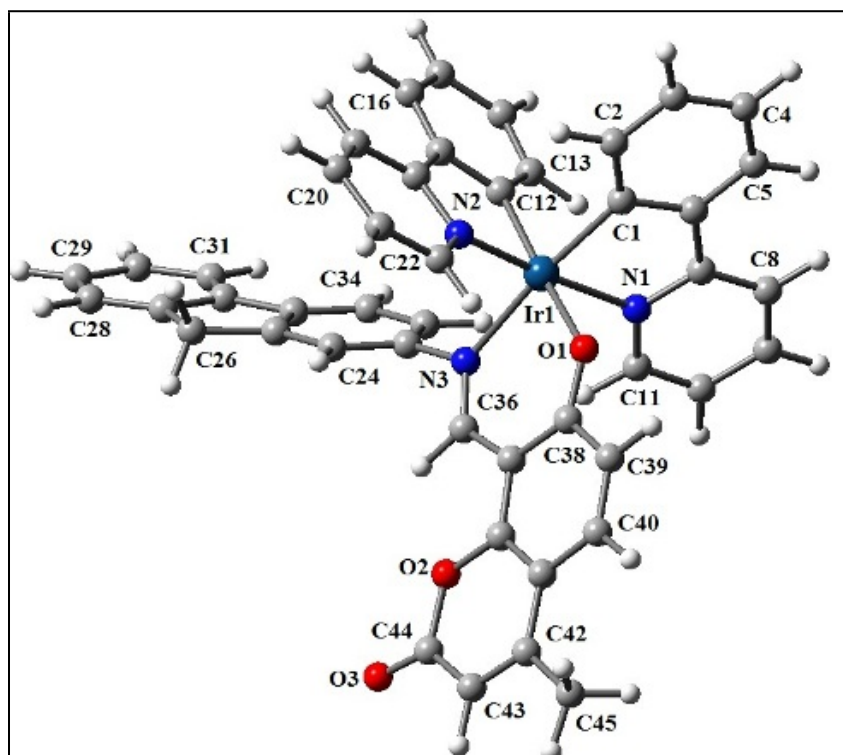

**Fig. S2** Optimized molecular structure of  $[\text{Ir}(2\text{-pypy})_2(\text{L}^2)]$ , **2** at  $\text{S}_0$  state. (Ir: Cyan, N: Blue, O: Red, C: Grey, H: White).

**Table S3** Frontier Molecular Orbital Composition (%) in the Ground State for  $[\text{Ir}(2\text{-pypy})_2(\text{L}^3)]$ , **3**

| Orbital | Energy (eV) | Contribution (%) |        |                 |                 | Main bond type                                         |
|---------|-------------|------------------|--------|-----------------|-----------------|--------------------------------------------------------|
|         |             | Ir               | 2-pypy | HL <sup>3</sup> |                 |                                                        |
|         |             |                  |        | Imine           | Aromatic system |                                                        |
| LUMO+5  | -1.340      | 0                | 0      | 2               | 98              | $\pi^*(2\text{-pypy}) + \pi^*(\text{HL}^3)$            |
| LUMO+4  | -1.720      | 4                | 2      | 0               | 95              | $\pi^*(2\text{-pypy}) + \pi^*(\text{HL}^3)$            |
| LUMO+3  | -1.770      | 3                | 2      | 1               | 93              | $\pi^*(\text{HL}^3)$                                   |
| LUMO+2  | -1.870      | 1                | 65     | 28              | 6               | $\pi^*(2\text{-pypy}) + \pi^*(\text{HL}^3)$            |
| LUMO+1  | -2.020      | 0                | 95     | 4               | 1               | $\pi^*(2\text{-pypy})$                                 |
| LUMO    | -2.170      | 1                | 78     | 19              | 1               | $\pi^*(2\text{-pypy}) + \pi^*(\text{HL}^3)$            |
| HOMO    | -5.480      | 35               | 38     | 3               | 24              | $d(\text{Ir}) + \pi(2\text{-pypy}) + \pi(\text{HL}^3)$ |
| HOMO-1  | -5.640      | 19               | 62     | 0               | 19              | $d(\text{Ir}) + \pi(2\text{-pypy}) + \pi(\text{HL}^3)$ |
| HOMO-2  | -5.690      | 35               | 49     | 1               | 16              | $d(\text{Ir}) + \pi(2\text{-pypy}) + \pi(\text{HL}^3)$ |
| HOMO-3  | -5.850      | 37               | 15     | 1               | 47              | $d(\text{Ir}) + \pi(2\text{-pypy}) + \pi(\text{HL}^3)$ |
| HOMO-4  | -6.490      | 12               | 9      | 0               | 79              | $d(\text{Ir}) + \pi(\text{HL}^3)$                      |
| HOMO-5  | -6.570      | 19               | 26     | 0               | 55              | $d(\text{Ir}) + \pi(2\text{-pypy}) + \pi(\text{HL}^3)$ |

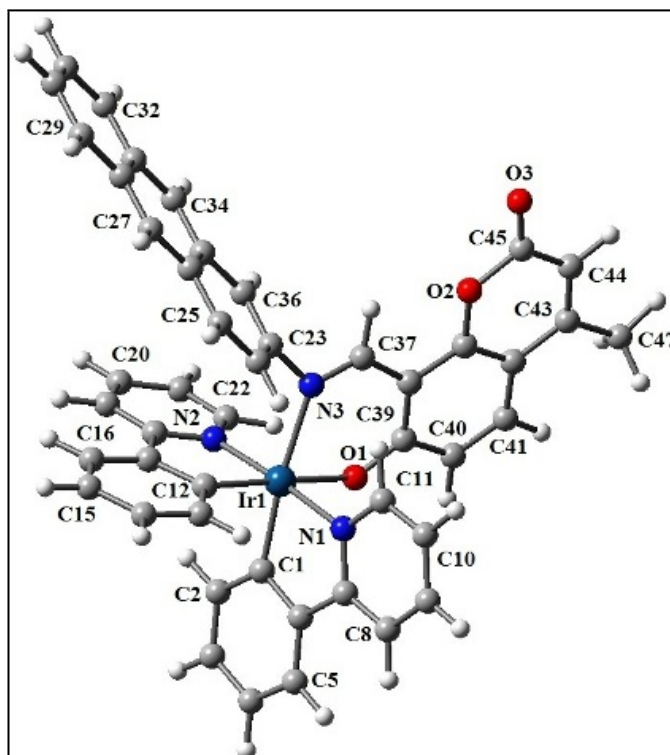

**Fig. S3** Optimized molecular structure of  $[\text{Ir}(\text{2-pypy})_2(\text{L}^3)]$ , **3** at  $S_0$  state. (Ir: Cyan, N: Blue, O: Red, C: Grey, H: White).

**Table S4** Main calculated optical transition for the complex  $[\text{Ir}(\text{2-pypy})_2(\text{L}^2)]$ , **2** with composition in terms of molecular orbital contribution of the transition, vertical excitation energies, and oscillator strength in dichloromethane

| Transition               | Composition                       | E (eV) | Oscillator strength (f) | CI     | $\lambda_{\text{theo}}$ (nm) | Assign                                          | $\lambda_{\text{exp}}$ (nm) |
|--------------------------|-----------------------------------|--------|-------------------------|--------|------------------------------|-------------------------------------------------|-----------------------------|
| $S_0 \rightarrow S_1$    | HOMO $\rightarrow$ LUMO (93%)     | 2.7692 | 0.0351                  | 0.682  | 448                          | $^1\text{MLCT} / ^1\text{ILCT} / ^1\text{LLCT}$ | 451                         |
|                          | HOMO $\rightarrow$ LUMO+1 (3%)    |        |                         | -0.109 |                              | $^1\text{ILCT} / ^1\text{LLCT}$                 |                             |
| $S_0 \rightarrow S_{12}$ | HOMO-3 $\rightarrow$ LUMO (6%)    | 3.5451 | 0.0212                  | 0.171  | 350                          | $^1\text{ILCT} / ^1\text{LLCT}$                 | 363                         |
|                          | HOMO-1 $\rightarrow$ LUMO+5 (3%)  |        |                         | 0.102  |                              | $^1\text{ILCT} / ^1\text{LLCT}$                 |                             |
|                          | HOMO $\rightarrow$ LUMO+5 (87%)   |        |                         | 0.660  |                              | $^1\text{MLCT} / ^1\text{ILCT} / ^1\text{LLCT}$ |                             |
| $S_0 \rightarrow S_{50}$ | HOMO-11 $\rightarrow$ LUMO (3%)   | 4.5248 | 0.1258                  | 0.101  | 274                          | $^1\text{MLCT} / ^1\text{ILCT} / ^1\text{LLCT}$ | 263                         |
|                          | HOMO-6 $\rightarrow$ LUMO+3 (7%)  |        |                         | 0.189  |                              | $^1\text{ILCT} / ^1\text{LLCT}$                 |                             |
|                          | HOMO-5 $\rightarrow$ LUMO+5 (3%)  |        |                         | -0.106 |                              | $^1\text{ILCT} / ^1\text{LLCT}$                 |                             |
|                          | HOMO-4 $\rightarrow$ LUMO+5 (52%) |        |                         | 0.513  |                              | $^1\text{MLCT} / ^1\text{ILCT} / ^1\text{LLCT}$ |                             |
|                          | HOMO $\rightarrow$ LUMO+8 (7%)    |        |                         | -0.185 |                              | $^1\text{ILCT} / ^1\text{LLCT}$                 |                             |
|                          | HOMO $\rightarrow$ LUMO+11 (3%)   |        |                         | 0.120  |                              | $^1\text{MLCT} / ^1\text{ILCT} / ^1\text{LLCT}$ |                             |
|                          | HOMO $\rightarrow$ LUMO+12 (8%)   |        |                         | -0.199 |                              | $^1\text{MLCT} / ^1\text{ILCT} / ^1\text{LLCT}$ |                             |

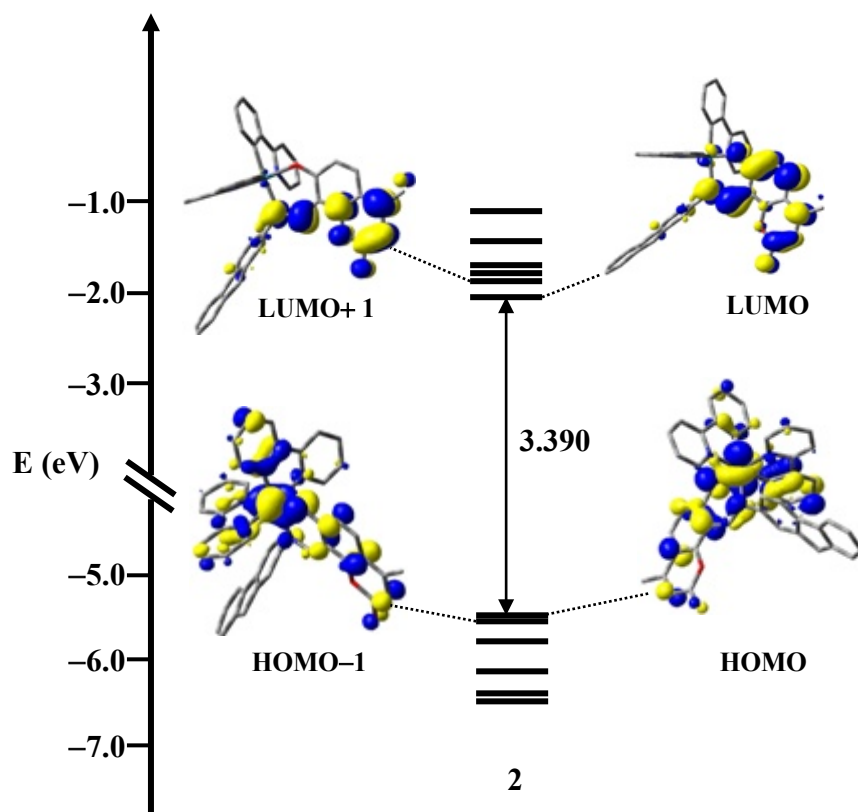

**Fig. S4** Partial molecular orbital diagram with some isodensity frontier molecular orbital mainly involved in the electronic transitions for complex  $[\text{Ir}(\text{2-pypy})_2(\text{L}^2)]$ , **2**.

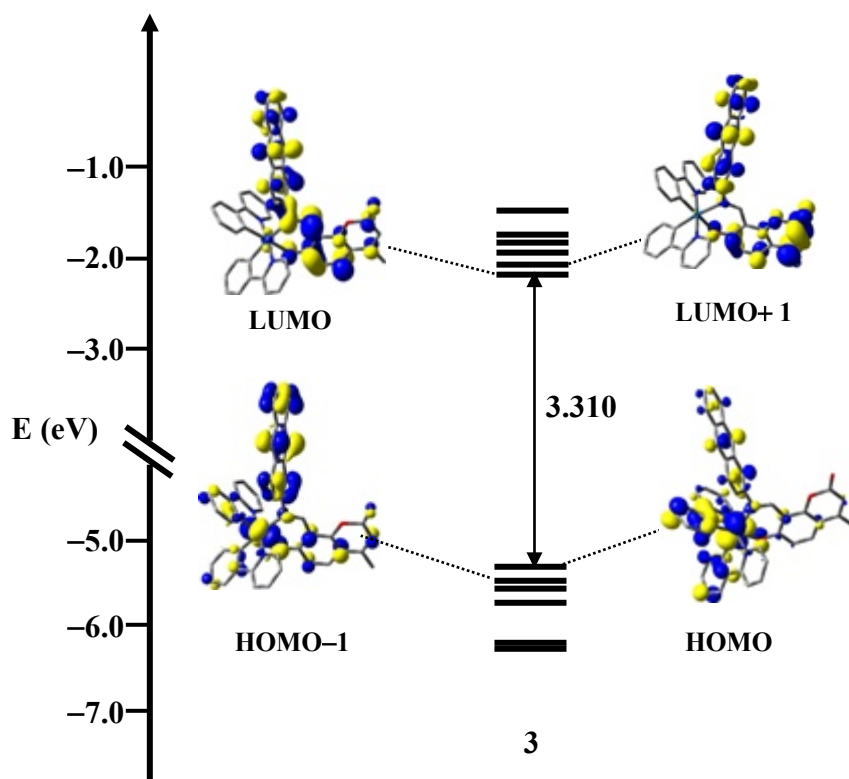

**Fig. S5** Partial molecular orbital diagram with some isodensity frontier molecular orbital mainly involved in the electronic transitions for complex  $[\text{Ir}(\text{2-pypy})_2(\text{L}^3)]$ , **3**.

**Table S5** Main calculated optical transition for the complex [Ir(2-pypy)<sub>2</sub>(L<sup>3</sup>)], **3** with composition in terms of molecular orbital contribution of the transition, vertical excitation energies, and oscillator strength in dichloromethane

| Transition                      | Composition           | E (eV) | Oscillator strength (f) | CI     | $\lambda_{\text{theo}}$ (nm) | Assign                                                   | $\lambda_{\text{exp}}$ (nm) |
|---------------------------------|-----------------------|--------|-------------------------|--------|------------------------------|----------------------------------------------------------|-----------------------------|
| S <sub>0</sub> →S <sub>1</sub>  | HOMO-1 → LUMO (5%)    | 2.7210 | 0.0667                  | 0.156  | 456                          | <sup>1</sup> ILCT/ <sup>1</sup> LLCT                     | 454                         |
|                                 | HOMO → LUMO (69%)     |        |                         | 0.586  |                              | <sup>1</sup> MLCT/ <sup>1</sup> ILCT/ <sup>1</sup> LLCT  |                             |
|                                 | HOMO → LUMO+1 (15%)   |        |                         | -0.270 |                              | <sup>1</sup> ILCT/ <sup>1</sup> LLCT                     |                             |
|                                 | HOMO → LUMO+2 (5%)    |        |                         | -0.158 |                              | <sup>1</sup> ILCT/ <sup>1</sup> LLCT                     |                             |
|                                 | HOMO → LUMO+3 (3%)    |        |                         | -0.107 |                              | <sup>1</sup> ILCT/ <sup>1</sup> LLCT                     |                             |
| S <sub>0</sub> →S <sub>18</sub> | HOMO-3 → LUMO+2 (7%)  | 3.4249 | 0.0107                  | -0.191 | 362                          | <sup>1</sup> ILCT/ <sup>1</sup> LLCT                     | 360                         |
|                                 | HOMO-3 → LUMO+3(34%)  |        |                         | 0.410  |                              | <sup>1</sup> MLCT/ <sup>1</sup> ILCT/ <sup>1</sup> LLCT  |                             |
|                                 | HOMO-3 → LUMO+4 (14%) |        |                         | -0.267 |                              | <sup>1</sup> MLCT/ <sup>1</sup> ILCT/ <sup>1</sup> LLCT  |                             |
|                                 | HOMO-2 → LUMO+1 (2%)  |        |                         | -0.105 |                              | <sup>1</sup> MLCT/ <sup>1</sup> ILCT/ <sup>1</sup> LLCT  |                             |
|                                 | HOMO-2 → LUMO+2 (3%)  |        |                         | 0.112  |                              | <sup>1</sup> MLCT/ <sup>1</sup> ILCT/ <sup>1</sup> LLCT  |                             |
|                                 | HOMO-2 → LUMO+5 (3%)  |        |                         | -0.116 |                              | <sup>1</sup> MLCT/ <sup>1</sup> ILCT/ <sup>1</sup> LLCT  |                             |
|                                 | HOMO-1 → LUMO+2(4%)   |        |                         | 0.148  |                              | <sup>1</sup> MLCT/ <sup>1</sup> ILCT/ <sup>1</sup> LLCT  |                             |
|                                 | HOMO-1 → LUMO+3 (5%)  |        |                         | -0.161 |                              | <sup>1</sup> MLCT/ <sup>1</sup> ILCT/ <sup>1</sup> LLCT  |                             |
|                                 | HOMO-1 → LUMO+4(4%)   |        |                         | -0.126 |                              | <sup>1</sup> MLCT/ <sup>1</sup> ILCT/ <sup>1</sup> LLCT  |                             |
|                                 | HOMO-1 → LUMO+5(3%)   |        |                         | 0.117  |                              | <sup>1</sup> MLCT/ <sup>1</sup> ILCT/ <sup>1</sup> LLCT  |                             |
|                                 | HOMO → LUMO+5(14%)    |        |                         | 0.261  |                              | <sup>1</sup> MLCT/ <sup>1</sup> ILCT/ <sup>1</sup> LLCT  |                             |
| S <sub>0</sub> →S <sub>50</sub> | HOMO-9 → LUMO (61%)   | 4.3927 | 0.0123                  | 0.552  | 282                          | <sup>1</sup> MLCT / <sup>1</sup> ILCT/ <sup>1</sup> LLCT | 259                         |
|                                 | HOMO-9 → LUMO+1 (10%) |        |                         | -0.228 |                              | <sup>1</sup> ILCT/ <sup>1</sup> LLCT                     |                             |
|                                 | HOMO-7 → LUMO+2(4%)   |        |                         | 0.141  |                              | <sup>1</sup> ILCT/ <sup>1</sup> LLCT                     |                             |
|                                 | HOMO-6 → LUMO+2(3%)   |        |                         | -0.129 |                              | <sup>1</sup> ILCT/ <sup>1</sup> LLCT                     |                             |
|                                 | HOMO-2 → LUMO+7 (2%)  |        |                         | 0.103  |                              | <sup>1</sup> MLCT / <sup>1</sup> ILCT/ <sup>1</sup> LLCT |                             |



**Table S6** Calculated triplet excited state of [Ir(2-pypy)<sub>2</sub>(L<sup>3</sup>)], **3** in dichloromethane based on the lowest lying triplet state geometry. Main calculated vertical transitions with compositions in terms of molecular orbital contribution of the transition, vertical excitation energies and oscillator strength

| Complex       | Excitation | Composition       | E (eV)                | Oscillator Strength (f) | CI       | Assign            | $\lambda_{\text{exp}}$ (nm) |
|---------------|------------|-------------------|-----------------------|-------------------------|----------|-------------------|-----------------------------|
| <b>3</b>      | 1          | HOMO – 8 → LUMO   | 2.6110 eV<br>(475 nm) | 0.0402                  | 0.10471  | <sup>3</sup> ILCT | 471                         |
|               |            | HOMO – 6 → LUMO   |                       |                         | –0.10181 | <sup>3</sup> ILCT |                             |
|               |            | HOMO – 2 → LUMO   |                       |                         | 0.28062  | <sup>3</sup> ILCT |                             |
|               |            | HOMO → LUMO + 1   |                       |                         | 0.20081  | <sup>3</sup> ILCT |                             |
|               |            | HOMO → LUMO+2     |                       |                         | 0.11247  | <sup>3</sup> ILCT |                             |
|               |            | HOMO → LUMO+3     |                       |                         | –0.10885 | <sup>3</sup> ILCT |                             |
|               |            | HOMO–1 → LUMO     |                       |                         | 0.21629  | <sup>3</sup> ILCT |                             |
|               |            | HOMO–1 → LUMO+1   |                       |                         | –0.27048 | <sup>3</sup> ILCT |                             |
|               |            | HOMO–1 → LUMO+2   |                       |                         | 0.34306  | <sup>3</sup> ILCT |                             |
|               |            | HOMO–1 → LUMO+3   |                       |                         | –0.11413 | <sup>3</sup> ILCT |                             |
|               |            | HOMO → LUMO+6     |                       |                         | 0.17999  | <sup>3</sup> ILCT |                             |
|               |            | HOMO–7 → LUMO     |                       |                         | –0.14542 | <sup>3</sup> ILCT |                             |
|               |            | HOMO–2 → LUMO+1   |                       |                         | 0.10396  | <sup>3</sup> ILCT |                             |
|               |            | HOMO-1 → LUMO+1   |                       |                         | 0.29340  | <sup>3</sup> ILCT |                             |
|               |            | HOMO-1 → LUMO+2   |                       |                         | –0.17370 | <sup>3</sup> ILCT |                             |
|               |            | HOMO-1 → LUMO+3   |                       |                         | –0.14011 | <sup>3</sup> ILCT |                             |
|               |            | HOMO-1 → LUMO+4   |                       |                         | 0.12243  | <sup>3</sup> ILCT |                             |
|               |            | HOMO → LUMO+1     |                       |                         | 0.16375  | <sup>3</sup> ILCT |                             |
|               |            | HOMO → LUMO+2     |                       |                         | 0.26723  | <sup>3</sup> ILCT |                             |
|               |            | HOMO → LUMO+3     |                       |                         | –0.19445 | <sup>3</sup> ILCT |                             |
| HOMO → LUMO+4 | 0.21550    | <sup>3</sup> ILCT |                       |                         |          |                   |                             |
| HOMO → LUMO+5 | –0.13981   | <sup>3</sup> ILCT |                       |                         |          |                   |                             |
| 2             | 2          | HOMO–7 → LUMO     | 2.7634eV<br>(448 nm)  | 0.0259                  | –0.62724 | <sup>3</sup> ILCT | 440                         |
|               |            | HOMO–2 → LUMO+1   |                       |                         | 0.18858  | <sup>3</sup> ILCT |                             |
|               |            | HOMO → LUMO+1     |                       |                         | 0.68975  | <sup>3</sup> ILCT |                             |
|               |            | HOMO → LUMO+2     |                       |                         | 0.13814  | <sup>3</sup> ILCT |                             |
|               |            | HOMO → LUMO+5     |                       |                         | –0.10024 | <sup>3</sup> ILCT |                             |

|                                       |      |          |
|---------------------------------------|------|----------|
| <sup>1</sup> MLCT / <sup>1</sup> ILCT | Hole | Electron |
|---------------------------------------|------|----------|

|           |   |                                                                               |  |  |
|-----------|---|-------------------------------------------------------------------------------|--|--|
| 454<br>nm | 3 | $S_1$<br>$w = 0.69$<br>2.721 eV (0.06)<br>$t_{2g} - \pi \rightarrow \pi^*$    |  |  |
| 360<br>nm |   | $S_{18}$<br>$w = 0.34$<br>3.424 eV (0.01)<br>$t_{2g} - \pi \rightarrow \pi^*$ |  |  |
| 259<br>nm |   | $S_{50}$<br>$w = 0.61$<br>4.392 eV (0.01)<br>$t_{2g} - \pi \rightarrow \pi^*$ |  |  |

**Fig. S6** Natural transition orbitals (NTOs) for the complex  $[\text{Ir}(\text{2-pypy})_2(\text{L}^3)]$ , **3** illustrating the nature of optically active singlet excited states in the absorption bands 454, 360 and 259 nm. For each state, the respective number of the state, transition energy (eV), and the oscillator strength (in parentheses) are listed. Shown are only occupied (holes) and unoccupied (electrons) NTO pairs that contribute more than 25% to each excited state. All transitions are mixed  $^1\text{MLCT}/^1\text{ILCT}$  character: charge is transferred from mainly  $t_{2g} - \pi$  hole orbital to the  $\pi^*$ orbital of the ligands.

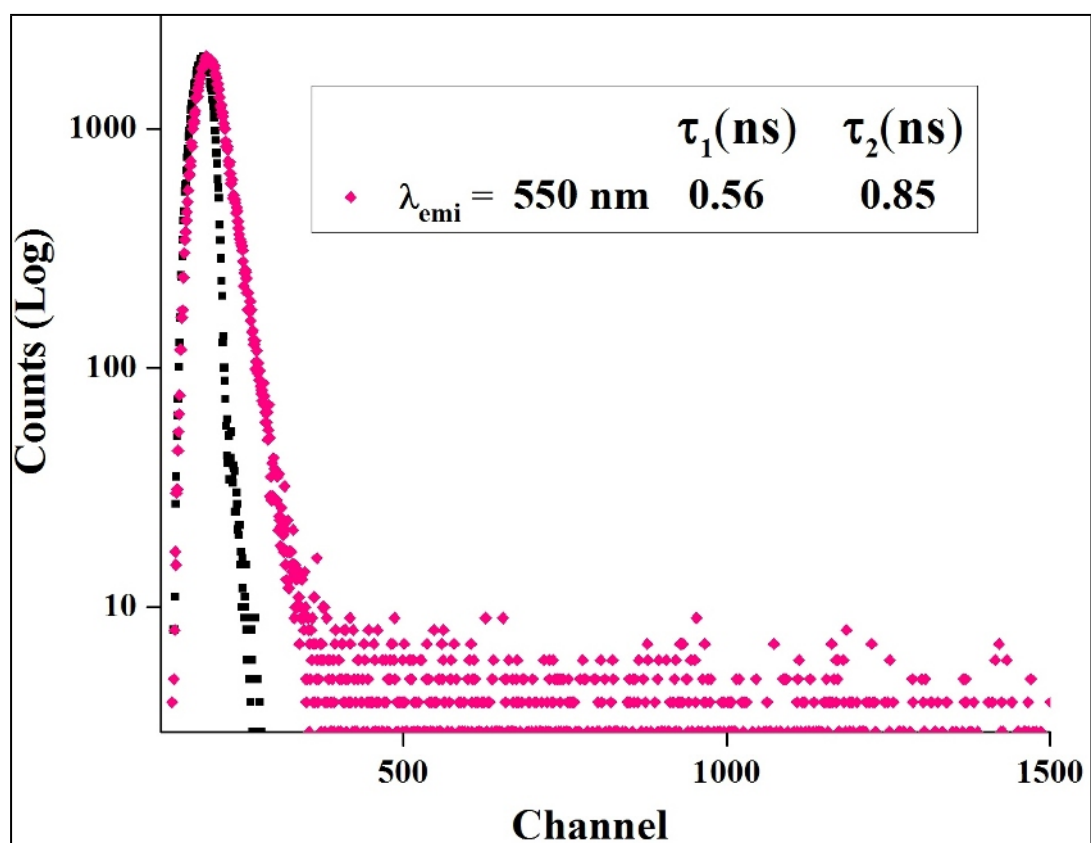

**Fig. S7** Changes in the time-resolved photoluminescence decay of complexes  $[\text{Ir}(\text{2-pypy})_2(\text{L}^1)]$ , **1** in dichloromethane at room temperature obtained with 450 nm excitation. The emission at 543 nm was monitored.

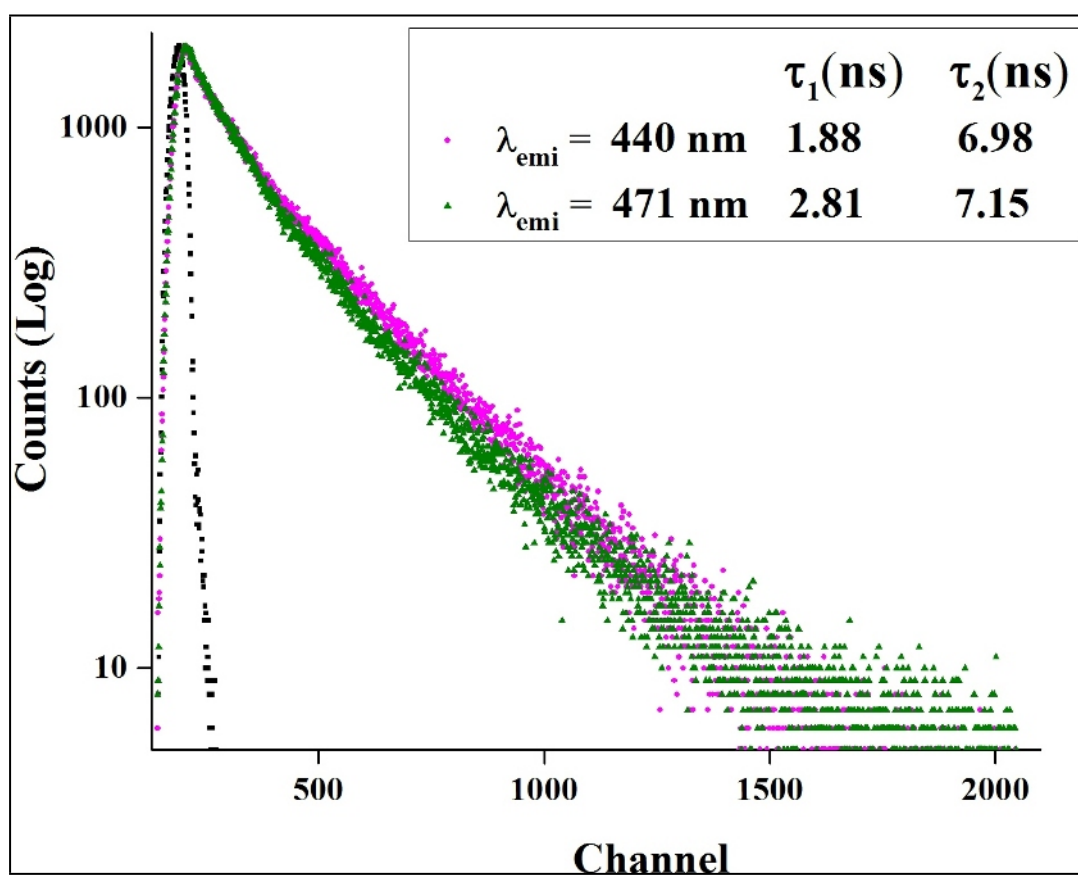

**Fig. S8** Changes in the time-resolved photoluminescence decay of complexes  $[\text{Ir}(\text{2-pypy})_2(\text{L}^3)]$ , **3** in dichloromethane at room temperature obtained with 450 nm excitation. The emission at 440 and 471 nm was monitored.

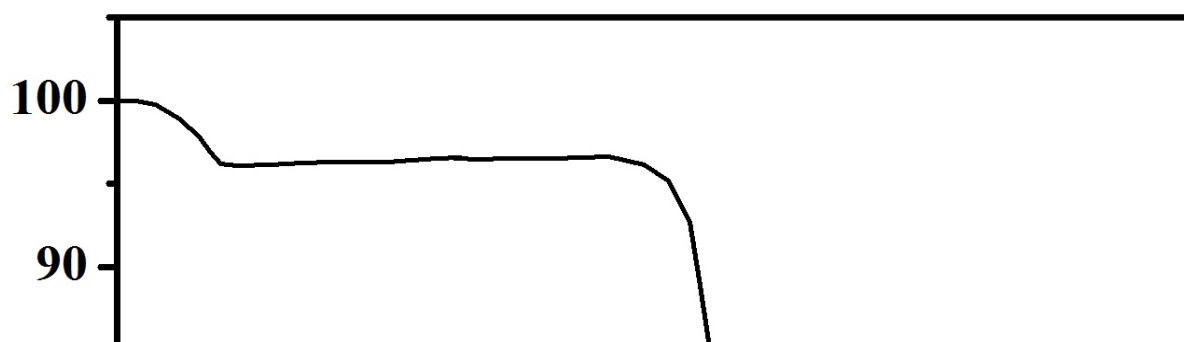

**Fig. S9** TG curve of complex  $[\text{Ir}(2\text{-pypy})_2(\text{L}^1)] \cdot 2\text{H}_2\text{O}, 1.2\text{H}_2\text{O}$
